1 **Functional tagging of endogenous proteins and rapid selection of cell pools**

2 **(Rapid generation of endogenously tagged *piwi* in ovarian somatic sheath cells.)**

3

4 Celine Marlin Andrews<sup>1\*</sup>, Parthena Konstantinidou<sup>1,2\*</sup>, Pavol Genzor<sup>1\*</sup>, Daniel Stoyko<sup>1\*</sup>, Alexandra  
5 R. Elchert<sup>1</sup>, Leif Benner<sup>1,3</sup>, Sushil Sobti<sup>1</sup>, Esther Y. Katz<sup>1</sup>, Qingcai Meng<sup>1</sup>, Astrid D. Haase<sup>1#</sup>

6

7 <sup>1</sup>National Institutes of Diabetes and Digestive and Kidney Diseases, National Institutes of Health,  
8 Bethesda, MD

9 <sup>2</sup>Department of Biochemistry, School of Medicine, University of Patras, 26504 Patras, Greece

10 <sup>3</sup>Department of Biology, Johns Hopkins University, Baltimore, MD, 21218, USA

11

12 \* These authors contributed equally

13 # [astrid.haase@nih.gov](mailto:astrid.haase@nih.gov)

14

15 The combination of genome-editing and epitope tagging provides a powerful strategy to study  
16 proteins with high affinity and specificity while preserving their physiological expression patterns.  
17 However, stably modifying endogenous genes in cells that do not allow for clonal selection has  
18 been challenging. Here, we present a simple and fast strategy to generate stable, endogenously  
19 tagged alleles in a non-transformed cell culture model. At the example of *piwi* in *Drosophila*  
20 ovarian somatic sheath cells, we show that this strategy enables the generation of an N-terminally  
21 tagged protein that emulates the expression level and subcellular localization of the wild type  
22 protein and forms functional Piwi-piRNA complexes. We present a concise workflow to establish  
23 modified cells, characterize the edited allele and probe the function of the tagged protein.

24

## 25 INTRODUCTION

26 Epitope tags provide high specificity and high affinity handles for our favorite genes. Optimized  
27 tags for visualization, purification and even functional manipulation can be used to track the  
28 localization of proteins, identify interaction partners and even induce degradation (1). Excellent  
29 tools are readily available and there is no need to engage in the laborious and expensive process  
30 of generating and optimizing antibodies for individual proteins (2). Epitope tags would be perfect,  
31 if they could be added to any protein without changing its expression and function. N-terminal or  
32 C-terminal tagging strategies, flexible linkers and small or globular tags provide a variety of  
33 combinations that can be adjusted to generate functionally tagged targets (1). However,  
34 maintaining the expression level and regulation of the endogenous genes has been challenging.  
35 Before CRISPR-assisted genome editing, adding a tag directly to an endogenous gene has only  
36 been practical in embryonic stem cells that support a high degree of homologous recombination,  
37 and involved the selection and clonal expansion of a single modified cell (2-4). Modern CRISPR  
38 strategies have expanded the repertoire of modifiable cell types but still mostly rely on the  
39 identification and clonal expansion of a single modified cell to establish a stable clonal cell line  
40 (5-7). Generation of mutant clones is generally the most time-consuming and laborious step in  
41 CRIPSR-based genome editing, and some cell culture systems do not at all support efficient clonal  
42 expansion.

43         Such a delicate cell culture system is *Drosophila* ovarian somatic sheath cells (OSC), a  
44 unique *ex vivo* model for a specialized small RNA silencing pathway that restricts mobile genetic  
45 elements, transposons, to guard genome integrity of germ cells (8) (Fig. 1A). PIWI-interacting  
46 small RNAs (piRNAs) and their PIWI protein partners form functional piRNA silencing  
47 complexes that recognize transposon transcripts by sequence complementarity and induce

48 silencing at transcriptional and post-transcriptional level (9-11). OSC were established from adult  
49 *Drosophila* ovaries initially as part of a co-culture system for germ cells (12). OSC reflect follicle  
50 cells of the germ cell niche and operate a Piwi-only piRNA pathway that induces transcriptional  
51 silencing of endogenous retroviruses (8). Piwi is one of three PIWI-clade Argonaute proteins in  
52 *Drosophila* (13). Mature Piwi-piRNA complexes transition to the nucleus, target nascent  
53 transposon transcripts and recruit the H3K9 histone methyl transferase Eggless/dSetDB1 to  
54 establish epigenetic restriction (14). Upon knock-down of *piwi*, restriction of various transposons  
55 is lost, and cells die (15, 16). The OSC represent the only *ex vivo* system to study transcriptional  
56 silencing by Piwi-piRNA complexes and has become an invaluable tool for piRNA biology. Here,  
57 we developed a strategy for epitope-tagging of endogenous proteins, rapid selection of edited cell  
58 pools, and established an endogenously FLAG-HA tagged *piwi* allele (eFH-*piwi*) in ovarian  
59 somatic sheath cells (OSC) that emulates the expression and function of wild type *piwi*.

## 60 MATERIALS AND METHODS

61 **Design and preparation of sgRNAs.** The sgRNA sequence was designed using the  
62 GuideScan algorithm (17). sgRNAs with no off-targets effects were chosen based on their  
63 proximity to the start codon. Complementary oligonucleotides, each with appropriate 5' overhangs  
64 (ps12\_sgRNA and pas13\_sgRNA, see supplementary table), were purchased from integrated DNA  
65 technologies (IDT). These oligos were annealed and cloned into pU6-BbsI-chiRNA (addgene  
66 #45946) after linearization with BbsI.

67 **Design and generation of the donor plasmid for homologous repair.** The donor plasmid  
68 was designed to contain an intronic selection cassette that allows the expression of the puromycin  
69 resistance gene from the opposite genomic strand. The splice donor and splice acceptor sites were  
70 modelled after the *Drosophila* MHC gene (exon 17: donor and exon 19: acceptor). A Kozak

71 sequence followed by a start codon (AATCAAA\_ATG) were placed after the intron in frame with  
72 a combined 3xFLAG-3xHA (FH) tag. The tags were spaced by flexible linkers (GSS). The intron  
73 contained a puromycin resistance gene driven by an Actin 5C promoter on the opposite genomic  
74 strand and inverted in orientation to avoid interference. The entire donor cassette containing the  
75 intron and the FH-tag were flanked by BbsI restriction sites that allow for insertion of homology  
76 arms. Homology arms, of about 750 bp, were amplified from OSC genomic DNA using primers  
77 1-4 and cloned into the donor plasmid using HiFi DNA Assembly (NEBuilder). (see  
78 supplementary table for primers and plasmids)

79 **Cell culture and transfection of ovarian somatic sheath cells (OSC).** OSC were cultured  
80 according to the initial instructions (12). The donor plasmid, the sgRNA plasmid and a plasmid  
81 expressing the Cas9 nuclease were transfected using the Xfect Transfection Reagent (631318,  
82 Takara). A Cas9 expression plasmid without a puromycin resistance was generated by removing  
83 puromycin from pAc-sgRNA-Cas9 (addgene# 49330). OSC cells seeded in 10 cm dishes, were  
84 transfected with a total of 30  $\mu$ g of the plasmids after reaching 40-50% confluency. The  
85 transfection mixture (plasmids, Xfect polymer, Xfect buffer) was added to the cells after replacing  
86 the complete medium (12) with medium lacking fly extract. The cells were incubated at 25°C for  
87 three hours after which, the minimal medium containing the transfection mixture was replaced  
88 with complete medium. To prevent nonhomologous end joining the cells were treated with SCR7  
89 (Selleckchem, S7742) at 5 $\mu$ M/mL upon replacement of complete medium, and again at 24 hours  
90 post transfection. Starting at 48 hours post transfection, cells were treated with puromycin at  
91 2 $\mu$ g/mL. During antibiotic selection, non-edited cells died within 3-5 days and stably edited cells,  
92 OSC:*eFH-piwi*, replenished the population within 2-3 weeks.

93           **Verification of genome editing by genomic PCR.** Genomic DNA was extracted from  
94 OSC:*eFH-piwi* and wild type (wt) OSC using gDNA kit (Zymo Research). PCR amplification was  
95 done using Q5 High-Fidelity DNA Polymerase (New England Biolabs, M0491). To amplify the  
96 transcript from the modified allele, we combined universal primers that recognize sequences in the  
97 Flag-HA tag and gene-specific primers that recognize the genomic *piwi* locus. The gene-specific  
98 primers were designed to reside outside the homology arms, primer ps1\_piwi and primer  
99 pas2\_piwi. Primers ps1\_piwi and pas2\_piwi were also coupled with primer pas3\_intron and primer  
100 ps4\_flag, respectively. PCR products were separated by a 1% Agarose gel electrophoresis and  
101 visualized using GelRed.

102           **Characterization of the mature edited mRNA.** Total RNA was extracted from  
103 OSC:*eFH-piwi* and wild type (WT) OSC using Trizol and Direct-zol RNA MiniPrep kit (Zymo  
104 Research, R2051). Complementary DNA (cDNA) was generated using the SuperScript IV  
105 (Thermo Fisher Scientific, 18090010) reverse transcription reagents and oligo dT<sub>20</sub> primers. For  
106 PCR amplification of the transcript from the modified allele, we combined universal primers that  
107 recognize sequences in the Flag-HA tag (pas5\_flag, pas7\_tag) and gene-specific primers that  
108 recognize the genomic *piwi* locus (ps6\_UHA). PCR products were separated by a 1% Agarose gel  
109 electrophoresis and visualized using GelRed.

110           **Protein quantification by western blotting.** OSC:*eFH-piwi* were lysed in 100 µl lysis buffer (20  
111 mM Tris-HCl pH 7.4, 250 mM NaCl, 2 mM MgCl<sub>2</sub>, 1% NP-40) supplemented with 1x Protease  
112 Inhibitor (Thermo Fisher Scientific, 1861281) and 0.1 U/µL Universal Nuclease (Thermo Fisher  
113 Scientific, 88701) and were incubated on ice for 15 minutes. The Cell lysates were centrifuged at  
114 full speed for 10 minutes, and the cleared lysate was transferred to new tube. After addition of  
115 reducing LDS Sample Buffer (Thermo Fisher Scientific, 84788) , the lysates were further

116 denatured at 95°C for 3 minutes, allowed to cool at room temperature and spun. Protein contents  
117 were separated through a NuPAGE 4-12% Bis-This Gel (Invitrogen, NP0321BOX). The separated  
118 proteins were transferred to a PVDF membrane. The membrane was incubated in Odyssey  
119 Blocking Buffer (PBS) (LI-Cor, 927-40100) supplemented with 0.1% Tween for 30 minutes at  
120 room temperature. Following blocking, the membrane was incubated with 1:2500 Rabbit anti-Piwi  
121 polyclonal antibody (18) in blocking buffer at 4°C overnight. The excess of antibody was washed  
122 off with TBST three times for 5 minutes and the membrane was incubated with 1:10000 IRdye800  
123 goat anti-Rabbit 2ry antibody (cat No: 92632211, Li-COR) for fifty minutes at room temperature  
124 in a dark container. Finally, the membrane was washed with TBST five times for 5 minutes and  
125 fluorescence was detected in the Odyssey Infrared Imaging System.

126 **Determination of subcellular localization by immunofluorescence and microscopy.**  
127 OSC:*eFH-piwi* were allowed to adhere to concanavalin A treated glass slides overnight. Cells were  
128 fixed using 4% PFA, permeabilized with 0.1% Triton x100, and blocked with 3% filtered BSA  
129 solution. Samples were washed with PBS following each step. The sample was probed using an  
130 Anti-HA High Affinity antibody (Sigma Aldrich, 11867423001) followed by Goat anti-rat IgG  
131 (H+L) Alexa Fluor 568 secondary antibody (Thermo Fisher Scientific, A-11077). DAPI was  
132 applied at a concentration of 1µg/ml. Slides were sealed with a cover slip using ProLong™ Glass  
133 Antifade Mountant (Thermo Fisher Scientific, P36980). Images were taken 24 hours later using  
134 an LSM 700 confocal microscope at 100x magnification.

135 **Purification of Piwi-piRNA and FH-Piwi-piRNA complexes and preparation of**  
136 **associated piRNAs for high-throughput sequencing.** PiRNA samples were prepared for wild-  
137 type (WT) and the endogenously Flag-HA-tagged Piwi (eFH-Piwi) protein (3 biological replicates  
138 each) using WT OSC and OSC:*eFH-piwi* respectively.

139 OSC cell pellets were dissolved in cold IP buffer (20mM Tris HCl pH7.4, 250mM NaCl, 2mM  
140 MgCl<sub>2</sub>, 1% NP40) supplemented with 1x Halt Protease & Phosphatase Inhibitor Cocktail (Thermo  
141 Fisher Scientific, 1861281) and were incubated on ice for 10 minutes. Lysates were then  
142 centrifuged at 13000g for 15 minutes and the supernatant (input) was used for  
143 immunoprecipitation. Lysates of OSC:*eFH-piwi* were incubated with 30μl anti-FLAG M2  
144 magnetic beads (Sigma-Aldrich, M8823). Lysates of WT OSC were incubated with 1μg of Rabbit  
145 anti-Piwi polyclonal antibody (18) and 30 μl Surebeads Protein A Magnetic beads (Bio-Rad,  
146 1614013). Immunoprecipitation was performed at 4°C overnight. Next day, the beads were washed  
147 three times with IP buffer, one time with high salt buffer (20mM Tris HCl pH7.4, 500mM NaCl,  
148 2mM MgCl<sub>2</sub>, 1% NP40), followed by one wash with IP buffer to remove the excess salt.  
149 Immunoprecipitated RNA was recovered with Trizol using the Direct-zol RNA MiniPrep kit  
150 (Zymo Research, R2051).

151 The purified piRNAs were prepared for Illumina sequencing using the general protocol  
152 described by Hafner M. et al. (19). In brief, RNAs were ligated to a 29nt long <sup>32</sup>P-labeled 3' index  
153 adapter and ligation products were recovered from a 12% Urea PAGE gel by extracting 48-58nt  
154 long fragments (corresponding to 19-2nt long input small RNAs). Next, 3'-ligated RNA was  
155 ligated to the 34nt long 5' DNA-RNA hybrid adaptor and ligation products (82-92nt long  
156 fragments) were recovered from a 10% Urea PAGE gel. piRNA libraries were sequenced using  
157 the Illumina HiSeq 3000 and obtaining 50nt single end reads. 5' and 3'adapters included a total  
158 of 10 unique molecular identifiers (UMIs) that allowed for elimination of PCR duplicates during  
159 bioinformatic analysis. See supplemental table for adaptor sequences.

160 **Initial computational processing of raw sequencing data.** The raw files (*fastq*) were  
161 processed by removing the constant adapter regions (5' & 3'; *cutadapt* v2.3) and retaining only

162 reads > 19-nucleotides (nt) in length. To remove PCR duplicates, reads were collapsed to unique  
163 sequences before removal of UMIs and only reads  $\geq 20$  nt in length were retained for further  
164 analysis. To optimize the file size for downstream analysis, piRNA reads were collapsed by  
165 sequence and stored in *fasta* format that retained multiplicity information. Each sequence has a  
166 *fasta* header according to the following formula: **SAMPLE\_NAME-S[id#]M[abundance#]**,  
167 where *id#* is the unique order of each sequence, and *abundance#* is the number of times each  
168 sequence was present. Our raw and processed files (*\*UNIQSEQS.fasta*) files are available online  
169 (GEO: GSE156058).

170 **Filters and genome mapping.** To remove potential contaminating RNA fragments from  
171 high-abundant cellular RNAs, the samples were mapped to ‘structural RNAs’ (tRNA, rRNA,  
172 snRNA, snoRNA; UCSC genome browse; dm6 assembly) using STAR aligner (v2.5.2b). The  
173 unmapped reads were then mapped to the dm6 genome allowing for up to 100 multimapping  
174 positions (STAR, v2.5.2b) (20).

175 **Data analyses and plotting.** Mapped data were analyzed in *R* as follows. The primary  
176 alignments (flag = 0 & 16) of perfectly mapping sequences (tag NM = 0) ranging from 18 to 32-  
177 nucleotides (nt) in length were extracted from bam files. The abundance information  
178 (*M[abundance#]*) was retrieved from sequence names. Read length distribution was calculated by  
179 first multiplying each sequence by its abundance, then counting the number of reads per size range,  
180 and finally dividing counts by total library size. Metagene analyses were performed by considering  
181 only uniquely mapping sequences (NH = 1). The sequences were centered at either 5` end (position  
182 1 = 1st nucleotide of piRNA). The region surrounding the center was expanded by 50nt in both  
183 directions producing a 100-nt interval. Genomic sequence for each interval was retrieved,  
184 duplicated by its abundance, and used to calculate the nucleotide frequency matrix. Annotations



185 by genomic origin were performed only for uniquely mapping sequences (NH = 1). Each sequence  
186 was duplicated by its abundance. The genomic positions were determined by intersecting reads  
187 first with sense and then with antisense of repeatmasker (dm6 genome; rnsk\_te) (21), exon and  
188 intron (UCSC; dm6 genome; refgene) annotation files in order. The unannotated sequences were  
189 labeled as other. All data were plotted using ggplot package.

190 Illumina sequencing data are available at GEO: GSE156058. All reagents are available upon  
191 request and will be deposited to a publicly available repository after publication.

192

## 193 **RESULTS**

### 194 **Generation of an endogenously tagged *piwi* allele and rapid selection of stable cell pools.**

195 In order to insert an epitope tag into the open reading frame of *piwi*, we designed an sgRNA to  
196 target the *piwi* gene close to the translation start codon (ATG). We would like to note that genetic  
197 polymorphisms between the OSC and the *Drosophila* reference genome (dm6) could hamper the  
198 targeting potential of an sgRNA that is designed based on the reference. Thus, we first tested the  
199 genomic target region by sanger sequencing and selected an sgRNA that can efficiently target the  
200 OSC genome. Next, we generated a donor construct for homologous repair with the aim to insert  
201 a FLAG-HA(FH)-tag in frame with *piwi*'s ATG and to independently expresses a puromycin  
202 resistance gene allowing for rapid selection of edited cells (Fig. 1A). To accommodate the  
203 puromycin resistance without disrupting *piwi*, we inserted an intron immediate upstream of the  
204 FH-tag. The intron contained the puromycin resistance gene driven by a constitutive promoter.  
205 Our design aimed to express two independent transcripts from different genomic strands: The first  
206 transcript is driven by the endogenous *piwi* promoter and generates a mature mRNA that only  
207 differs from the wild type (WT) transcript by an additional exon-exon junction and a FH-tag fused

208 to *piwi*'s open reading frame (ORF). The second transcript is produced from the opposite genomic  
 209 strand and produces an independent mRNA encoding the puromycin resistance (Fig. 1A). We co-  
 210 transfected the plasmid expressing the sgRNA and the donor construct together with a Cas9  
 211 CRISPR nuclease into OSC and treated the cells with the DNA-Ligase IV inhibitor SCR7 to  
 212 increase the probability for homologous repair (HR) (22) (Fig. 1B). We started selection of edited  
 213 cells using Puromycin 48 hours after transfection.  
 214 Wild type OSC were sensitive to 2µg/ml Puromycin  
 215 and died within three to five days. Successfully  
 216 edited cells were resistant to the puromycin  
 217 treatment and reconstituted a healthy cell population  
 218 (OSC: *eFH-piwi*) within two to three weeks.

219 **Figure 1. A universal strategy for simple and rapid genomic editing**  
 220 **of cell populations.** (A) *Drosophila* ovarian somatic sheath cells  
 221 (OSC) represent a unique but delicate model to study Piwi-piRNA  
 222 mechanism ex vivo. OSC express one of the three *Drosophila* PIWI  
 223 proteins, Piwi. PiRNAs are generated from long piRNA cluster  
 224 transcripts by the endonuclease Zucchini (Zuc). Mature Piwi-piRNA  
 225 silencing complexes transition into the nucleus, recognize nascent  
 226 transposon transcripts by base-pairing complementarity and induce  
 227 epigenetic silencing. (B) Endogenous tagging of *piwi* in OSC. An  
 228 sgRNA was designed to target the endogenous *piwi* gene in the vicinity  
 229 of the start codon (ATG). The donor construct for homologous repair  
 230 contained a FLAG-HA (FH)-tag and a puromycin resistance gene.  
 231 The FH-tag was fused in frame with *piwi*'s open reading frame (ORF)  
 232 to generate an endogenously N-terminally tagged protein (*eFH*-). The  
 233 puromycin resistance was placed into a synthetic intron and  
 234 transcribed from the opposite genomic strand. The edited allele is  
 235 designed to express two independent transcripts: The *piwi* transcript  
 236 remains under the control of the endogenous promoter and contains  
 237 an additional intron and a tag. The mature modified mRNA differs  
 238 from the wt *piwi* mRNA only by an additional exon-exon junction and  
 239 the Flag-HA tag. The second transcript is independently generated  
 240 from the opposite genomic strand and produces an mRNA encoding a  
 241 puromycin resistance under the control of an Actin promoter. (C)  
 242 Rapid and simple generation of stably edited OSC:*eFH-piwi*.  
 243 Ovarian somatic sheath cells (OSC) were transfected with an  
 244 expression plasmid for the sgRNA, the Cas9 endonuclease, and the  
 245 donor plasmid. Cells were treated with SCR7, an inhibitor of non-  
 246 homologous end joining (NHEJ) to increase the probability for  
 247 homologous repair. Antibiotic selection with Puromycin (Puro) was  
 248 started 48 hours after transfection. After 2-3 weeks, a puromycin  
 249 resistant cell population has repopulated the dish

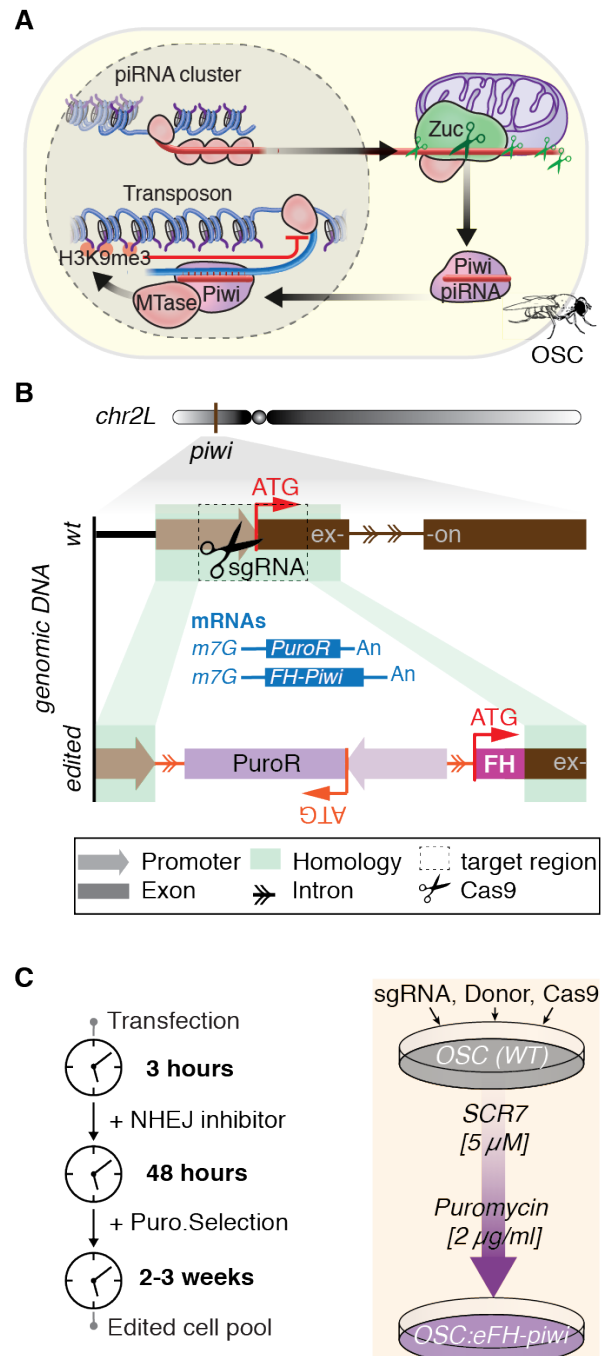

## 250 **Characterization of the modified cell population.**

251 To probe the Puromycin resistant cells for correct genomic insertion of the donor cassette we  
252 performed a diagnostic PCR on genomic DNA (gDNA). PCR primers were chosen to detect either  
253 the wild type (WT) or the modified allele (eFH-*piwi*) (Fig. 2A). With the intention to generate a  
254 universal toolset for endogenous tagging of multiple genes in OSC, we designed a set of primers  
255 that recognize a sequence immediately following the splice-donor (SD) or the FH-tag. These  
256 universal primers were combined with gene specific primers (ps1\_piwi and pas2\_piwi) that  
257 recognize genomic sequences 5' and 3' of the *piwi* homology arms and efficiently detect the wild  
258 type (WT) allele. To adapt this strategy to other genes, only the gene-specific primers need to be  
259 changed and optimized using WT  
260 gDNA. OSC are largely diploid (23),  
261 and our genotyping detects a modified  
262 and a WT allele in the engineered cells  
263 suggesting a heterozygous edit (Fig.  
264 2B).

265 Next, we tested whether  
266 splicing of the introduced intron was  
267 accurate and efficient. We placed  
268 primers upstream and downstream of  
269 the exon-junction to amplify two  
270 precise short sequences indicating the  
271 spliced transcript in complementary  
272 DNA (cDNA). We readily detected the

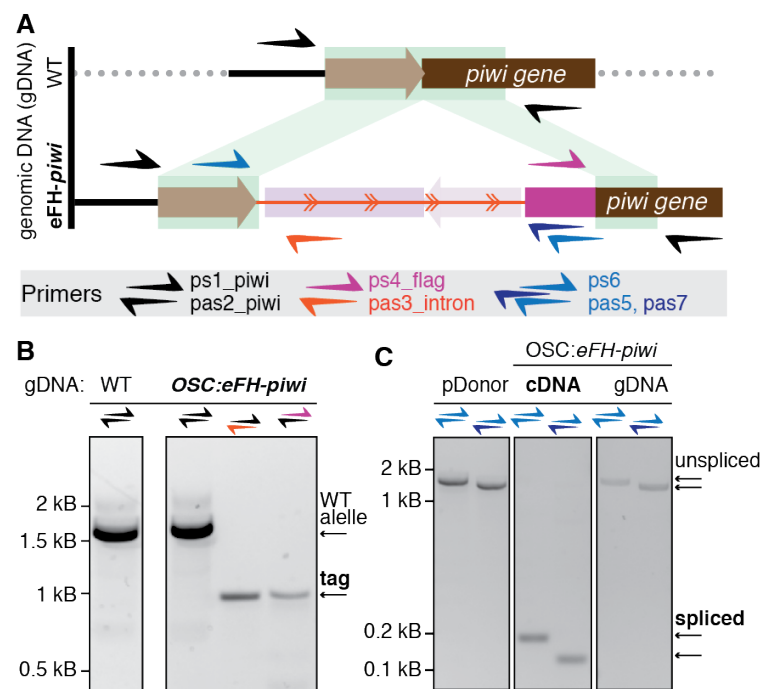

**Figure 2. Characterization of the genomic edit and the resulting eFH-*piwi* transcript.** (A) Schematic representation of the wild type and the edited *piwi* allele. The priming sites for universal and gene-specific primers that were used for genotyping and cDNA characterization are indicated. (B) Genotyping of OSC:eFH-*piwi* reveals a heterozygous editing event. PCR with the indicated primers (A) was performed on genomic DNA (gDNA). gDNA from WT OSC was used as control. (C) Characterization of eFH-*piwi* transcripts indicate accurate splicing of the synthetic intron. PCR was performed on complementary DNA (cDNA) using the indicated primers. Primers were designed to detect the unspliced and spliced transcript (A). The donor plasmid and gDNA served as control for the unspliced transcript.

273 properly spliced transcript in *OSC:eFH-piwi* (Fig. 2C). The un-spliced pre-mRNA was  
274 undetectable in cDNA. We would like to note that the context of the splice donor and acceptor  
275 sites are crucial for efficient splicing and have been optimized in our donor construct. Thus, we  
276 suggest maintaining the nucleotides upstream and downstream of the splice donor and acceptor  
277 sites when adapting the construct to target other genomic locations.

278

279 **Endogenously tagged FH-Piwi (eFH-Piwi) protein maintains wild type expression levels and**  
280 **correct subcellular localization.**

281 Next, we tested the expression level of the endogenously tagged Piwi protein (eFH-Piwi). Based  
282 on our gDNA analysis that revealed a heterozygous edit, we expected the *OSC:eFH-piwi* to  
283 express a tagged and a wild type Piwi protein from the edited and the WT allele respectively. If  
284 our engineered allele faithfully maintained the regulation of the endogenous *piwi* and both the  
285 mRNA and the protein did not differ in stability, we expected an equal amount of tagged and  
286 endogenous Piwi proteins. To quantify the levels of eFH-Piwi and wild type Piwi relative to each  
287 other, we separated increasing amounts of cell extract by SDS-PAGE and detected both proteins  
288 by western blotting using an endogenous Piwi antibody (Fig. 3A). The FH-tag adds 7.79 kDa to  
289 the Piwi protein and allows for discrimination of the tagged and the untagged protein by size. Our  
290 quantification revealed that the *OSC:eFH-piwi* expressed both a tagged and a wild type Piwi  
291 protein to similar extent.

**Figure 3. eFH-Piwi protein emulates the expression and subcellular localization of wt Piwi in OSC.** (A) Heterozygous OSC:eFH-piwi expresses WT Piwi and eFH-Piwi protein to similar levels. Wt Piwi and eFH-Piwi were detected with an anti-Piwi antibody. Different amounts of cell extracts were analyzed as indicated. Protein quantification was performed by western blotting using fluorescent antibodies and the LI-COR Odyssey technology for accurate automated quantification. (B) FH-Piwi appropriately localizes to the nucleus of OSC:eFH-piwi. The subcellular localization of eFH-Piwi was characterized by immunofluorescence using an anti-HA primary antibody and confocal microscopy. An anti-Tubulin antibody and DAPI were used for cytoplasmic and nuclear counterstain respectively

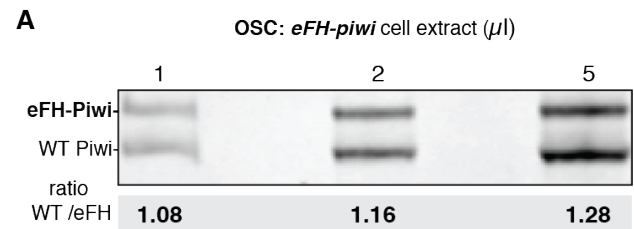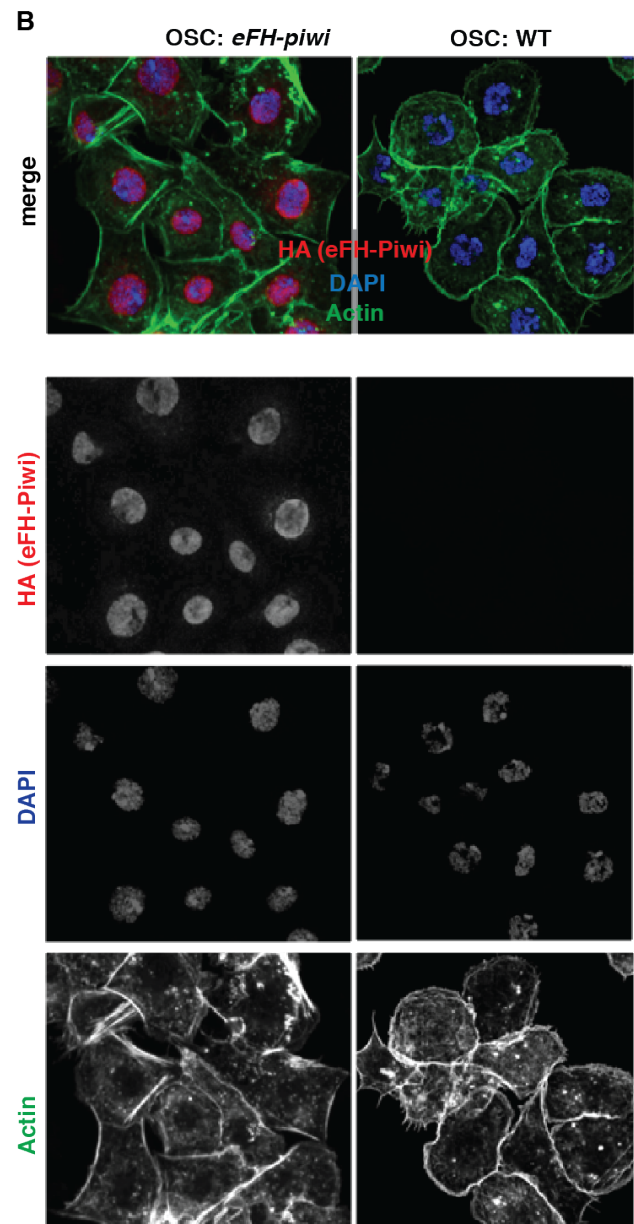

292 To evaluate the correct subcellular  
293 localization of eFH-Piwi, we performed  
294 immunofluorescence analyses using an anti-HA  
295 antibody (Fig. 3B). Piwi is known to localize to  
296 and function in the nucleus in OSC and in fly  
297 ovaries (8, 24, 25). Our results show that the  
298 endogenously tagged protein appropriately  
299 localizes to the nucleus of OSC:eFH-piwi (Fig.  
300 3B).

301  
302 **PiRNAs associated with eFH-Piwi are**  
303 **comparable to wild type (WT) Piwi-piRNAs**  
304 **by biogenesis signatures, length profile and**  
305 **genomic origin.**

306 To directly characterize piRNAs associated with  
307 eFH-Piwi and compare them to WT Piwi-

308 piRNAs, we purified eFH-Piwi from OSC:eFH-piwi and Piwi from WT OSC, and prepared the  
309 associated piRNAs for high-throughput sequencing (Fig. 4). FH-Piwi complexes could be

310 specifically purified from the heterozygous *OSC:eFH-piwi* using a specific anti-FLAG antibody  
311 under stringent wash conditions (Fig. 4A). Associated piRNAs were extracted and cDNA libraries  
312 were generated for Illumina sequencing (19). For accurate quantification of small RNA reads, we  
313 included ten unique molecular identifiers (UMI) (26) in the ligated adapters before cDNA  
314 preparation and PCR amplification (Fig. 4B). These UMIs enable elimination of PCR-duplicates  
315 during data analyzes and thus ensure an unbiased representation of the sampled small RNA  
316 population.

317  
318 Piwi-piRNAs are produced by the phased action of the Zucchini-processor complex that  
319 generates a characteristic preference for Uridine (U) in the first position of the mature piRNAs (9,  
320 10, 18). Additional preferences for Uridine can be observed one piRNA length upstream and  
321 downstream (position -26 and +26) indicating proceeding and preceding piRNAs in a metagene  
322 analysis (18). These processing signatures can be readily observed for WT Piwi-piRNAs in OSC  
323 and for piRNAs associated with eFH-Piwi (Fig. 4C). Uniquely mapping piRNA associated with  
324 WT Piwi or with eFH-Piwi were aligned at their first position and the genomic interval was  
325 extended to include one piRNA length upstream and one piRNA-length downstream of the  
326 observed molecules. The relative frequency of all four nucleotides was calculated for each position  
327 across a 100 nucleotide (nt) window and revealed the characteristic phased 1U-signature. These  
328 results suggest that eFH-Piwi, like WT Piwi, is fueled with piRNAs that are generated by the ZUC-  
329 processor complex.

330 Next, we compared the length distribution of piRNAs associated with WT Piwi or with  
331 eFH-Piwi. The length profiles of piRNAs are characteristic for their associated PIWI protein and  
332 have been suggested to reflect a footprint of the PIWI protein during 3' end formation (24, 27, 28).  
333 Like WT Piwi-piRNAs, eFH-Piwi-piRNAs exhibit a preferred length of 25-26nt (Fig. 4D).

334 Finally, we tested whether both piRNA populations originate from the same genomic  
 335 regions. Piwi-piRNAs originate to a large part from precursors with antisense complementarity to  
 336 transposons and other repetitive elements that can be annotated by Repeatmasker (rmsk) (24).  
 337 Results from our analysis show that more than half of the piRNAs associated with WT and eFH-  
 338 Piwi contain sequences that are antisense to genomic repeats (Fig. 4E).

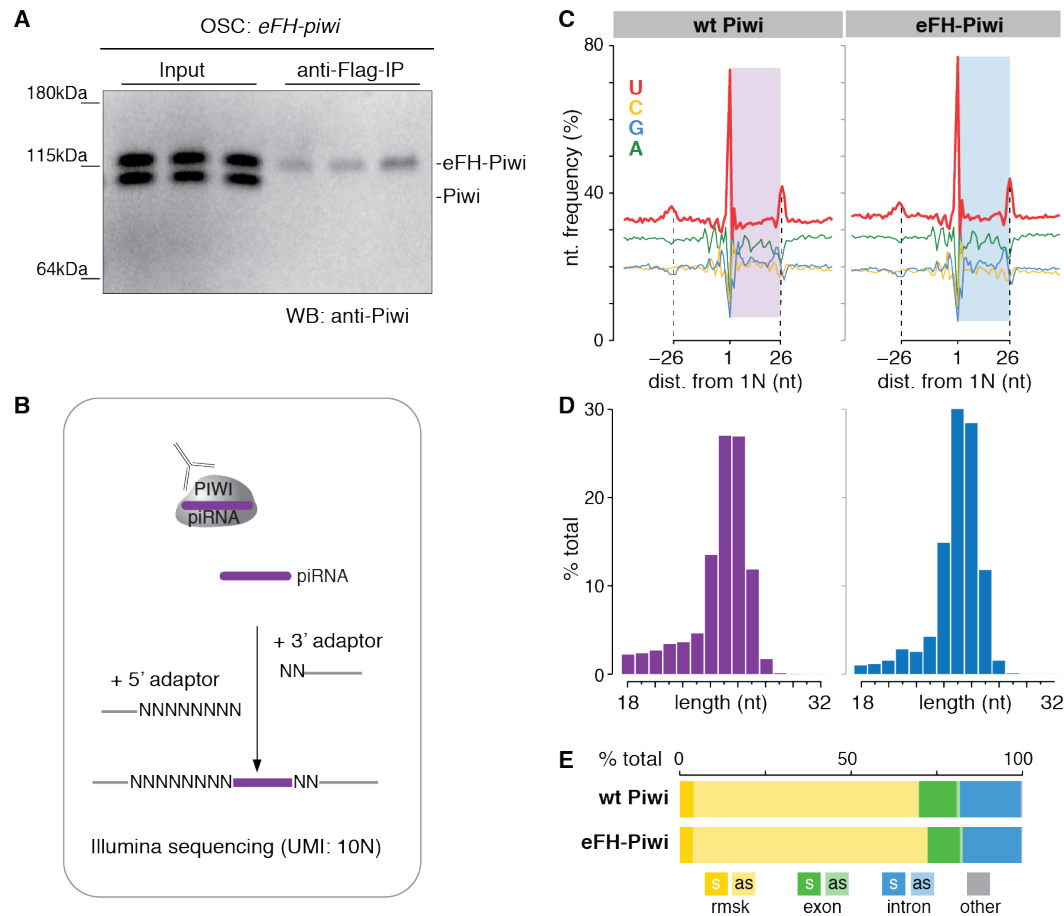

**Figure 4. eFH-Piwi associates with piRNAs to form mature piRNA silencing complex.** (A) eFH-Piwi was specifically immunopurified (IP) from OSC:eFH-piwi using an anti-Flag antibody. (B) Small RNAs were extracted from the purified Piwi-piRNA complexes and prepared for Illumina sequencing. 3' and 5' adaptors were sequentially ligated to the small RNAs before reverse transcription and PSC amplification. A total of 10 unique molecular identifiers (UMI: 10N) was accommodated in the ligated adaptors and allowed for removal of PSC duplicates during analyses. (C) PiRNAs associated with eFH-Piwi exhibit the same phased 1U-signatures as WT Piwi-piRNAs, indicating biogenesis by the Zuc-processor complex. Metagene analysis of uniquely mapping piRNAs aligned at their 5' end across an extended genomic interval. The observed piRNA population is indicated as colored box. Nucleotide frequencies are shown across a 100 nt interval. Both piRNA populations show the characteristic patterns of phased processing by the Zucchini processor complex indicated by a preference for Uridine in the first position (1U), and both one piRNA length upstream (-26) and one piRNA length downstream (26) of the observed piRNAs. (B) Length profiles of piRNAs associated with eFH-Piwi and WT Piwi in nucleotides (nt). Both piRNA populations show a length distribution characteristic for Piwi-piRNAs. (C) eFH-Piwi-piRNAs, like WT Piwi-piRNAs are enriched for sequences that are antisense to annotated repeats (rmsk). More than half of either piRNA population represents sequences with antisense complementarity to transposons and other repeat elements (repeat masker, rmsk). The orientation with respect to the matching feature is indicated (sense, s; antisense, as)

339           Taken together, results from our molecular and computational analyses show that eFH-  
340 Piwi emulates the expression level and subcellular localization of WT Piwi and forms complexes  
341 with piRNAs that are indistinguishable from wild type piRNAs. Our approach combines precise  
342 genome editing with simple antibiotic selection to generate stably edited cells that express an  
343 endogenously tagged protein within a few weeks. Our strategy bypasses the need for selection of  
344 edited cell clones, which is laborious and does not work effectively for all cell types. Overall, we  
345 aim to share the strategy and reagents that enable the rapid establishment of endogenously tagged  
346 proteins and provide means to add high-affinity and high-specificity tags for biochemical and  
347 biological experiments.

348

## 349 **DISCUSSION**

350 While in the case of Piwi, specific and sensitive antibodies for detection and purification are  
351 available (24), such tools are often missing especially for germline specific proteins. Generation  
352 of effective antibodies is laborious, costly, and often unsuccessful, even with a sincere effort. The  
353 addition of a Flag-HA (FH) tandem tag to *piwi* enabled us to increase stringent washes during  
354 Piwi-piRNA purification and generated a relevant biological tool to study the Piwi-only pathway  
355 in OSC.

356           Conventional strategies of endogenous tagging often involve selection, characterization,  
357 and growth of individual cell clones, a laborious and time-consuming procedure. Furthermore,  
358 clonal selection establishes a novel cell line with unique characteristics and requires the analyses  
359 of multiple clonal lines and rescue experiments to confidently exclude changes due to clonal  
360 selection. Our approach capitalizes on the advantages of endogenous tagging while eliminating  
361 the need for clonal selection by the alternative of antibiotic selection.



362           Accommodating the antibiotic resistance in an optimized synthetic intron provides an  
363 opportunity to not only edit the beginning or end of a gene, but also to modify gene-internal  
364 sequences. Our donor cassette could be modified to generate mutations or deletions within a gene  
365 body. Such an approach could be used to obliterate or mimic sites of post-translational  
366 modifications, change enzymatic activities, or engineer non-coding RNAs. Overall, our method  
367 describes a simple and rapid technique to generate edited cell pools with facility cell biological  
368 experiments.  
369

370 **References**

- 371
- 372 1. Vandemoortele,G., Eyckerman,S. and Gevaert,K. (2019) Pick a Tag and Explore the  
373 Functions of Your Pet Protein. *Trends in Biotechnology*, **37**, 1078–1090.
- 374 2. Zhang,X., Guo,C., Chen,Y., Shulha,H.P., Schnetz,M.P., LaFramboise,T., Bartels,C.F.,  
375 Markowitz,S., Weng,Z., Scacheri,P.C., *et al.* (2008) Epitope tagging of endogenous proteins  
376 for genome-wide ChIP-chip studies. *Nat Meth*, **5**, 163–165.
- 377 3. Palmiter,R.D. and Brinster,R.L. (1985) Transgenic mice. *Cell*, **41**, 343–345.
- 378 4. Kanca,O., Bellen,H.J. and Schnorrer,F. (2017) Gene Tagging Strategies To Assess Protein  
379 Expression, Localization, and Function in Drosophila. *Genetics*, **207**, 389–412.
- 380 5. Hsu,P.D., Lander,E.S. and Zhang,F. (2014) Development and Applications of CRISPR-Cas9  
381 for Genome Engineering. *Cell*, **157**, 1262–1278.
- 382 6. Knott,G.J. and Doudna,J.A. (2018) CRISPR-Cas guides the future of genetic engineering.  
383 *Science*, **361**, 866–869.
- 384 7. Bukhari,H. and Müller,T. (2019) Endogenous Fluorescence Tagging by CRISPR. *Trends in*  
385 *Cell Biology*, **29**, 912–928.
- 386 8. Saito,K., Inagaki,S., Mituyama,T., Kawamura,Y., Ono,Y., Sakota,E., Kotani,H., Asai,K.,  
387 Siomi,H. and Siomi,M.C. (2009) A regulatory circuit for piwi by the large Maf gene traffic  
388 jam in Drosophila. *Nature*, **461**, 1296–1299.
- 389 9. Ozata,D.M., Gainetdinov,I., Zoch,A., Carroll,D.X.N.O.X. and Zamore,P.D. (2018) PIWI-  
390 interacting RNAs: small RNAs with big functions. *Nature Reviews Genetics*, **442**, 1–20.
- 391 10. Czech,B., Munafò,M., Ciabrelli,F., Eastwood,E.L., Fabry,M.H., Kneuss,E. and Hannon,G.J.  
392 (2018) piRNA-Guided Genome Defense: From Biogenesis to Silencing. *Annu. Rev. Genet.*,  
393 **52**, 131–157.
- 394 11. Yamashiro,H. and Siomi,M.C. (2018) PIWI-Interacting RNA in Drosophila: Biogenesis,  
395 Transposon Regulation, and Beyond. *Chem. Rev.*, **118**, 4404–4421.
- 396 12. Niki,Y., Yamaguchi,T. and Mahowald,A.P. (2006) Establishment of stable cell lines of  
397 Drosophila germ-line stem cells. *Proc. Natl. Acad. Sci. U.S.A.*, **103**, 16325–16330.
- 398 13. Lin,H. and Spradling,A.C. (1997) A novel group of pumilio mutations affects the asymmetric  
399 division of germline stem cells in the Drosophila ovary. *Development*, **124**, 2463–2476.
- 400 14. Sienski,G., Batki,J., Senti,K.-A., Dönertas,D., Tirian,L., Meixner,K. and Brennecke,J. (2015)  
401 Silencio/CG9754 connects the Piwi-piRNA complex to the cellular heterochromatin  
402 machinery. *Genes Dev.*, **29**, 2258–2271.

- 403 15. Haase,A.D., Fenoglio,S., Muerdter,F., Guzzardo,P.M., Czech,B., Pappin,D.J., Chen,C.,  
404 Gordon,A. and Hannon,G.J. (2010) Probing the initiation and effector phases of the somatic  
405 piRNA pathway in *Drosophila*. *Genes Dev.*, **24**, 2499–2504.
- 406 16. Muerdter,F., Guzzardo,P.M., Gillis,J., Luo,Y., Yu,Y., Chen,C., Fekete,R. and Hannon,G.J.  
407 (2013) A Genome-wide RNAi Screen Draws a Genetic Framework for Transposon Control  
408 and Primary piRNA Biogenesis in *Drosophila*. *Molecular Cell*, **50**, 736–748.
- 409 17. Perez,A.R., Pritykin,Y., Vidigal,J.A., Chhangawala,S., Zamparo,L., Leslie,C.S. and  
410 Ventura,A. (2017) GuideScan software for improved single and paired CRISPR guide RNA  
411 design. *Nat Biotechnol*, 10.1038/nbt.3804.
- 412 18. Stein,C.B., Genzor,P., Mitra,S., Elchert,A.R., Ipsaro,J.J., Benner,L., Sobti,S., Su,Y.,  
413 Hammell,M., Joshua-Tor,L., *et al.* (2019) Decoding the 5' nucleotide bias of PIWI-  
414 interacting RNAs. *Nat Commun*, **10**, 828.
- 415 19. Hafner,M., Renwick,N., Farazi,T.A., Mihailović,A., Pena,J.T.G. and Tuschl,T. (2012)  
416 Barcoded cDNA library preparation for small RNA profiling by next-generation sequencing.  
417 *Methods*, **58**, 164–170.
- 418 20. Dobin,A., Davis,C.A., Schlesinger,F., Drenkow,J., Zaleski,C., Jha,S., Batut,P., Chaisson,M.  
419 and Gingeras,T.R. (2013) STAR: ultrafast universal RNA-seq aligner. *Bioinformatics*, **29**,  
420 15–21.
- 421 21. Jin,Y., Tam,O.H., Paniagua,E. and Hammell,M. (2015) TEtranscripts: a package for  
422 including transposable elements in differential expression analysis of RNA-seq datasets.  
423 *Bioinformatics*, **31**, 3593–3599.
- 424 22. Maruyama,T., Dougan,S.K., Truttmann,M.C., Bilate,A.M., Ingram,J.R. and Ploegh,H.L.  
425 (2015) Increasing the efficiency of precise genome editing with CRISPR-Cas9 by inhibition  
426 of nonhomologous end joining. *Nat Biotechnol*, **33**, 538–542.
- 427 23. Sytnikova,Y.A., Rahman,R., Chirn,G.-W., Clark,J.P. and Lau,N.C. (2014) Transposable  
428 element dynamics and PIWI regulation impacts lncRNA and gene expression diversity in  
429 *Drosophila* ovarian cell cultures. *Genome Research*, **24**, 1977–1990.
- 430 24. Brennecke,J., Aravin,A.A., Stark,A., Dus,M., Kellis,M., Sachidanandam,R. and Hannon,G.J.  
431 (2007) Discrete Small RNA-Generating Loci as Master Regulators of Transposon Activity in  
432 *Drosophila*. *Cell*, **128**, 1089–1103.
- 433 25. Sienski,G., Dönertas,D. and Brennecke,J. (2012) Transcriptional Silencing of Transposons  
434 by Piwi and Maelstrom and Its Impact on Chromatin State and Gene Expression. *Cell*, **151**,  
435 964–980.
- 436 26. Kivioja,T., Vähärautio,A., Karlsson,K., Bonke,M., Enge,M., Linnarsson,S. and Taipale,J.  
437 (2011) Counting absolute numbers of molecules using unique molecular identifiers. *Nat*  
438 *Meth*, **9**, 72–74.

439 27. Vagin, V.V. (2006) A Distinct Small RNA Pathway Silences Selfish Genetic Elements in the  
440 Germline. *Science*, **313**, 320–324.

441 28. Aravin, A.A., Lagos-Quintana, M., Yalcin, A., Zavolan, M., Marks, D., Snyder, B.,  
442 Gaasterland, T., Meyer, J. and Tuschl, T. (2003) The small RNA profile during *Drosophila*  
443 *melanogaster* development. *Developmental Cell*, **5**, 337–350.

444
